# Supplementary material for: The Interaction of CtIP and Nbs1 Connects CDK and ATM to Regulate HR–Mediated Double-Strand Break Repair
Source: PubMed Central journal article supplement (PMC3585124; doi:10.1371/journal.pgen.1003277), 2013-02-28
Supplement: pgen.1003277.s007.pdf [file pgen.1003277.s007.pdf]

# Table S1

| <b>CtIP SP/TP site</b> | <b>Recovered peptide sequence</b>                               |
|------------------------|-----------------------------------------------------------------|
| <b>S10</b>             | G.SSCGS(p)PNSADTSSDFKDLWTK.L                                    |
| <b>S163</b>            | K.IENDQQHQAAELECEEDVIPDS(p)PITAFSFGVNR.L                        |
|                        | K.IENDQQHQAAELECEEDVIPDS(p)PITAFSFGVNR.L                        |
|                        | E.CEEDVIPDS(p)PITAFSFGVNR.L                                     |
|                        | E.CEEDVIPDS(p)PITAFSFGVNR.L                                     |
|                        | E.DVIPDS(p)PITAFSFGVNR.L                                        |
| <b>S233</b>            | K.VSKSSTHPQHNPNEILVADTYDQSQS(p)PMAK.A                           |
|                        | K.SSTHPQHNPNEILVADTYDQS(p)QS(p)PMAK.A                           |
|                        | K.SSTHPQHNPNEILVADTYDQSQS(p)PMAK.A                              |
|                        | S.STHPQHNPNEILVADTYDQSQS(p)PMAK.A                               |
|                        | S.STHPQHNPNEILVADTYDQSQS(p)PMAKAH.G                             |
|                        | S.STHPQHNPNEILVADTYDQSQS(p)PMAKAH.G                             |
|                        | S.STHPQHNPNEILVADTYDQSQS(p)PMAKAHGTS.S                          |
|                        | E.ILVADTYDQSQS(p)PMAK.A                                         |
|                        | E.ILVADTYDQSQS(p)PMAKAHGTS.S                                    |
| <b>T245</b>            | K.AHGTSSTY(p)PDKSSFNLTVAE.T                                     |
| <b>S276</b>            | K.AHGTSSTYTPDKSSFNLTVAEATLGLGVQEESETQGPMS(p)PLGDELYHCLEGNHK.K   |
|                        | K.AHGTSSTYTPDKSSFNLTVAEATLGLGVQEESETQGPMS(p)PLGDELYHCLEGNHK.K   |
|                        | K.AHGTS(p)SYTPDKSSFNLTVAEATLGLGVQEESETQGPMS(p)PLGDELYHCLEGNHK.K |
|                        | K.AHGTSSTYTPDKSSFNLTVAEATLGLGVQEESETQGPMS(p)PLGDELYHCLEGNHK.K   |
|                        | K.SSFNLTVAEATLGLGVQEESETQGPMS(p)PLGDELYHCLEGNHK.K               |
|                        | E.TLGLGVQEESETQGPMS(p)PLGDE.L                                   |
|                        | E.TLGLGVQEESETQGPMS(p)PLGDELYHCL.E.G                            |
|                        | E.TLGLGVQEESETQGPMS(p)PLGDELYHCL.EGNHK.K                        |
|                        | G.LGVQEESETQGPMS(p)PLGDELYH.C                                   |
|                        | G.LGVQEESETQGPMS(p)PLGDELYHCL.E.G                               |
|                        | G.LGVQEESETQGPMS(p)PLGDELYHCL.EGNHK.K                           |
|                        | G.VQEESETQGPMS(p)PLGDELYHCL.E.G                                 |
|                        | G.VQEESETQGPMS(p)PLGDELYHCL.EGNHK.K                             |
|                        | E.ESETQGPMS(p)PLGDELYHCL.E.G                                    |
|                        | E.ESETQGPMS(p)PLGDELYHCL.EGNHK.K                                |
|                        | E.SETQGPMS(p)PLGDELYHCL.E.G                                     |
|                        | E.SETQGPMS(p)PLGDELYHCL.EGNHK.K                                 |
|                        | E.SETQGPMS(p)PLGDELYHCL.EGNHK.K                                 |
|                        | E.TQGPMS(p)PLGDELYHCL.E.G                                       |
|                        | E.TQGPMS(p)PLGDELYHCL.EGNHK.K                                   |
| <b>T315</b>            | R.NTEDSLRFSDS(p)T(p)SKT(p)PPQEELPTR.V                           |
|                        | R.NTEDSLRFSDSTSKT(p)PPQEELPTRV.S(p)S(p)PVFGATSSIK.S             |
|                        | R.FSDSTSKT(p)PPQEELPTR.R                                        |
|                        | R.FSDSTSKT(p)PPQEELPTR.V                                        |
|                        | R.FSDST(p)SKT(p)PPQEELPTR.V                                     |
|                        | R.FSDS(p)TSKT(p)PPQE                                            |
|                        | R.FSDSTSKT(p)PPQEELPTR.V.S                                      |
|                        | R.FSDSTSKT(p)PPQEELPTRVSS(p)PVFG.A                              |
|                        | R.FSDSTSKT(p)PPQEELPTRVSS(p)PVFGAT.S                            |
|                        | R.FSDSTSKT(p)PPQEELPTRVSS(p)PVFGAT.S                            |
|                        | R.FSDSTSKT(p)PPQEELPTRVSS(p)PVFGATSSI.K                         |
|                        | R.FSDSTSKT(p)PPQEELPTRVSS(p)PVFGATSSIK.S                        |
|                        | R.FSDSTSKT(p)PPQEELPTRVSS(p)PVFGATSSIK.S                        |
|                        | R.FSDS(p)TSKT(p)PPQEELPTRV.S(p)SPVFGATSSIK.S                    |
|                        | R.FSDS(p)TSKT(p)PPQEELPTRVSS(p)PVFGATSSIK.S                     |
|                        | R.FS(p)DSTSKT(p)PPQEELPTRVSS(p)PVFGATSSIK.S                     |
| <b>S327</b>            | R.NTEDSLRFS(p)DS(p)TSKTPPQEELPTRVSS(p)PVFGATSSIK.S              |
|                        | R.NTEDSLRFS(p)DST(p)SKTTPPQEELPTRV.S(p)SPVFGATSSIK.S            |
|                        | KTPPQEELPT(p)RVSS(p)PVFGATSSIK.S                                |
|                        | R.NTEDSLRFSDSTSKT(p)PPQEELPTRV.S(p)S(p)PVFGATSSIK.S             |
|                        | R.FSDSTSKT(p)PPQEELPTRVSS(p)PVFG.A                              |
|                        | R.FSDS(p)TSKTPPQEELPTRVSS(p)PVFG.A                              |
|                        | R.FSDSTSKT(p)PPQEELPTRVSS(p)PVFGAT.S                            |
|                        | R.FSDSTSKTPPQEELPTRVSS(p)PVFGAT.S                               |
|                        | R.FSDSTSKT(p)PPQEELPTRVSS(p)PVFGAT.S                            |

|             |                                                      |
|-------------|------------------------------------------------------|
|             | R.FSDSTSKT(p)PPQEELPTRVSS(p)PVFGATS.S                |
|             | R.FSDSTSKTPPQEELPTRVSS(p)PVFGATSSI.K                 |
|             | R.FSDSTSKT(p)PPQEELPTRVSS(p)PVFGATSSI.K              |
|             | R.FSDSTSKTPPQEELPTRVSS(p)PVFGATSSIK.S                |
|             | R.FSDSTSKT(p)PPQEELPTRVSS(p)PVFGATSSIK.S             |
|             | R.FSDS(p)TSKT(p)PPQEELPTRVSS(p)PVFGATSSIK.S          |
|             | K.TPPQEELPTRVSS(p)PVFGATS.S                          |
|             | K.TPPQEELPTRVSS(p)PVFGATSSIK.S                       |
|             | K.TPPQEELPTRVSS(p)PVFGATSSIKSGLDLNTSLSPSLLQPGKK.K    |
|             | R.VSS(p)PVFGATSSIK.S                                 |
| <b>S347</b> | K.SGLDLNTSLS(p)PSLLQPGK.K                            |
|             | K.SGLDLNTSLS(p)PSLLQPGK.K                            |
|             | K.SGLDLNTS(p)LS(p)PSLLQPGK.K                         |
|             | K.SGLDLNTSLS(p)PSLLQPGKK.K                           |
|             | K.SGLDLNTSLS(p)PSLLQPGKKK.H                          |
| <b>S549</b> | K.TIPKGFSSSRKASDGNCTLPKDS(p)PGEPCSQE.C               |
|             | K.GFSSSRKAS(p)DGNCTLPKDS(p)PGEPCSQE.C                |
|             | R.KASDGNCTLPKDS(p)PGEPCSQE.C                         |
|             | NCTLPKDS(p)PGEPCSQE.C                                |
|             | R.KASDGNCTLPKDS(p)PGEPCSQECIILQPLNK.C                |
|             | R.KASDGNCTLPKDS(p)PGEPCSQECIILQPLNKCS(p)PDNKPSLQIK.E |
|             | R.KASDGNCTLPKDS(p)PGEPCSQECIILQPLNKCS(p)PDNKPSLQIK.E |
|             | K.ASDGNCTLPKDS(p)PGEPCSQEC                           |
| <b>S568</b> | K.DSPGEPSCQECIILQPLNKCS(p)PDNKPSLQ.I                 |
|             | K.DSPGEPSCQECIILQPLNKCS(p)PDNKPSLQIK.E               |
|             | K.DSPGEPSCQECIILQPLNKCS(p)PDNKPSLQIKEENAVFK.I        |
|             | K.DSPGEPSCQECIILQPLNKCS(p)PDNKPSLQIKEE.N             |
|             | E.CIILQPLNKCS(p)PDNKPSLQIKEENAVFK.I                  |
|             | N.KCS(p)PDNKPSLQIKEENAVFK.I                          |
| <b>S889</b> | R.RQPYNAIFS(p)PK.G                                   |
